# Supplementary material for: Anti-prion activity of an RNA aptamer and its structural basis
Source: PubMed Central journal article supplement — Nucleic Acids Res. 2012 Nov 23;41(2):1355–62. doi: 10.1093/nar/gks1132 (PMC3553944; doi:10.1093/nar/gks1132), 2012-11-23
Supplement: supp_gks1132_nar-02016-f-2012-File006.pdf [file supp_gks1132_nar-02016-f-2012-File006.pdf]

Table S1. NMR and refinement statistics for complexes

|                                              | Peptide      | RNA         |
|----------------------------------------------|--------------|-------------|
| <b>NMR distance and dihedral constraints</b> |              |             |
| Distance restraints                          |              |             |
| Total NOE                                    | 1162         | 1336        |
| Intra-residue                                | 294          | 436         |
| Inter-residue                                | 868          | 900         |
| Sequential ( $ i-j  = 1$ )                   | 406          | 548         |
| Non-sequential ( $ i-j  > 1$ )               | 462          | 352         |
| Hydrogen bonds                               |              | 80          |
| Peptide–RNA intermolecular                   | 476          |             |
| Total dihedral angle restraints              |              | 84          |
| RNA                                          |              |             |
| Sugar pucker                                 |              | 70          |
| Backbone                                     |              | 14          |
| <b>Structure statistics</b>                  |              |             |
| Violations (mean and s.d.)                   |              |             |
| Distance constraints (Å)                     | 0.107 ± 0.00 |             |
| Dihedral angle constraints (°)               | 1.18 ± 0.06  |             |
| Max. dihedral angle violation (°)            | 5.0          |             |
| Max. distance constraint violation (Å)       | 0.51         |             |
| Deviations from idealized geometry           |              |             |
| Bond lengths (Å)                             | 0.02 ± 0.00  |             |
| Bond angles (°)                              | 1.84 ± 0.00  |             |
| Impropers (°)                                | 1.87 ± 0.01  |             |
| Average pairwise r.m.s.d.* (Å)               |              |             |
| Peptide                                      |              |             |
| Heavy except residues 12                     | 0.68 ± 0.20  |             |
| Backbone except residues 12                  | 0.22 ± 0.06  |             |
| RNA                                          |              |             |
| All RNA heavy                                |              | 0.59 ± 0.10 |
| Complex                                      |              |             |
| Peptide except residues 12 and RNA           | 0.63 ± 0.09  |             |

\*Pairwise r.m.s.d. was calculated among 10 refined structures.

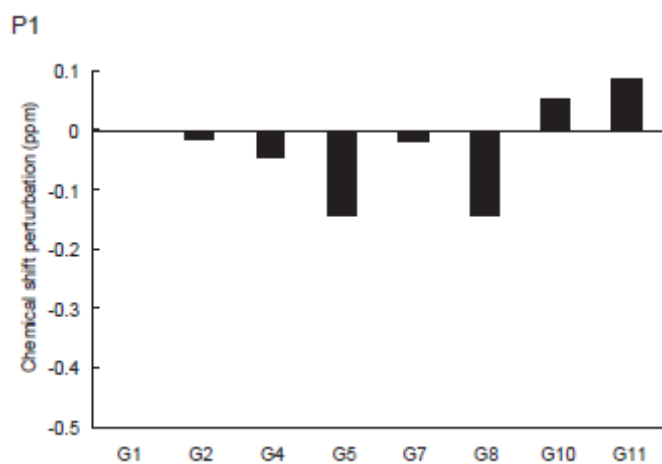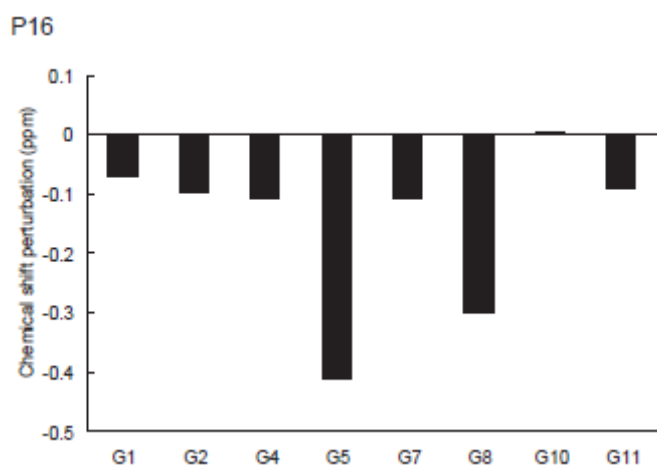

Figure S1. Chemical shift perturbation of R12 with the addition of either P1 or P16. Chemical shift perturbation observed for each imino proton of R12 on binding of either P1 (upper) or P16 (lower).

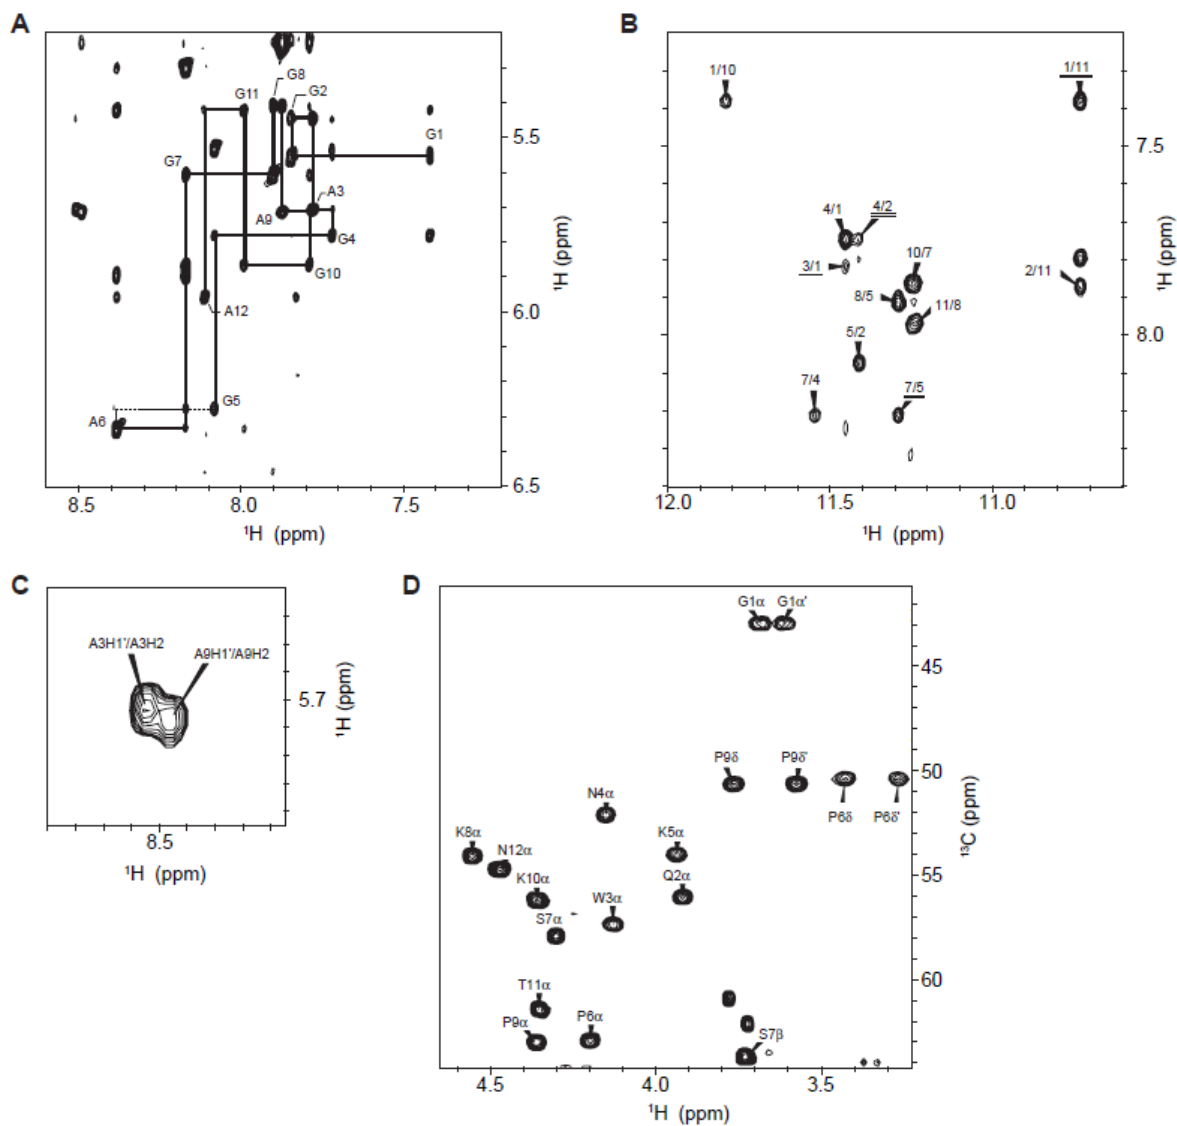

Figure S2. Analysis of NMR spectra of the R12:P16 complex. **(A)** The finger print region of the NOESY spectrum for R12. The H1' (i-1)-H8(i)-H1'(i) connectivities are traced, intrasidue cross peaks being denoted by residue numbers. **(B)** Imino-H8 NOESY cross peaks for R12. The cross peaks as to G:A base pairs are underlined, and those between the tetrad and hexad planes are double-underlined, respectively. **(C)** Intermolecular A3H2-A3H1' and A9H2-A9H1' NOESY cross peaks confirming the dimeric architecture of R12. **(D)** H $\alpha$ -C $\alpha$  and Proline H $\delta$ -C $\delta$  correlation peaks of P16 in the  $^1\text{H}$ - $^{13}\text{C}$  HSQC spectrum.
